# Supplementary material
Source: ML conference proceedings conference paper supplement (https://openaccess.thecvf.com/content/ICCV_2019/html/Zhao_Learning_Perspective_Undistortion_ICCV_2019_paper.html)
Supplement: Supplementary file 1 [file Zhao_Learning_Perspective_Undistortion_ICCV_2019_supplemental.pdf]

Archive with 3 entries (2 files):
- 3593-supp/
- 3593-supp/Learning Perspective Undistortion of Portraits_appendix.pdf
- 3593-supp/Learning Perspective Undistortion of Portraits_supplementary.pdf
