# Supplementary material
Source: ML conference proceedings conference paper supplement (https://openaccess.thecvf.com/content/ICCV_2019/html/Zhao_Learning_Perspective_Undistortion_ICCV_2019_paper.html)
Supplement: Supplementary file 1 [file Zhao_Learning_Perspective_Undistortion_ICCV_2019_supplemental.pdf › 3593-supp/Learning Perspective Undistortion of Portraits_appendix.pdf]

# Learning Perspective Undistortion of Portraits

## Appendix

Yajie Zhao<sup>1,\*</sup>, Zeng Huang<sup>1,2,\*</sup>, Tianye Li<sup>1,2</sup>, Weikai Chen<sup>1</sup>, Chloe LeGendre<sup>1,2</sup>, Xinglei Ren<sup>1</sup>,  
Jun Xing<sup>1</sup>, Ari Shapiro<sup>1</sup>, and Hao Li<sup>1,2,3</sup>

<sup>1</sup>USC Institute for Creative Technologies

<sup>2</sup>University of Southern California

<sup>3</sup>Pinscreen

### 1. Test Data Pre-Process

Before feeding an arbitrary portrait to our cascaded network, we first detect the face bounding box using the method of Viola and Jones [5] and then segment out the head region with a segmentation network based on FCN-8s [3]. The network is trained using modified portrait data from Shen et al. [4]. In order to handle images with arbitrary resolution, we pre-process the segmented images to a uniform size of  $512 \times 512$ . The input image is first scaled so that its detected inter-pupillary distance matches a target length, computed by averaging that of ground truth images. The image is then aligned in the same manner as the training data, by matching the inner corner of each subject’s right eye to a fixed position. We then crop and pad the image to  $512 \times 512$ , maintaining the right eye inner alignment.

### 2. Training Data Preparation

We rendered synthetic portraits using a variety of camera distances, head poses, and incident illumination conditions. In particular, we rendered 10 different views for each subject, randomly sampling candidate head poses in the range of  $-45$  to  $+45$  in pitch, yaw, and roll. For each view, we rendered the subject using global illumination and image-based lighting, randomly sampling the illumination from a light probe image gallery of 107 unique environments. For each head pose and lighting condition, we rendered the subject at twenty different distances, including the canonical distance of  $1.6m$ , observed as free from perspective distortion. Empirically, we observed that  $23cm$  is the minimal distance that captures a full face without obvious lens distortion (note that we do not consider special types of lenses, e.g. fisheye or wide-angle); thus we sample the distances by considering 10 distance bins uniformly distributed from  $23cm$  to  $1.6m$ . We adjusted the focal length of the rendering camera to ensure consistent framing, which yields

a focal length range of  $18mm - 128mm$ . To ensure efficient learning, we aligned the renderings by matching the inner corner of each subject’s right eye to a fixed position. We use the techniques of Alexander et al. [1] and Chiang and Fyffe [2] to render photo-realistic portraits in real-time using OpenGL shaders, which include separable subsurface scattering in screen-space and photo-real eye rendering.

To supplement this data with additional identities, we also rendered portraits using the 3D facials scans of the BU-4DFE dataset [6], after randomly sampling candidate head poses in the range of  $-15$  to  $+15$  in pitch and yaw and sampling the same range of camera distances. These were rendered simply using perspective projection and rasterization, without changing illumination or considering complex reflectance properties. Out of 58 female subjects and 43 male subjects total, we trained using 38 female and 25 male subjects, keeping the rest set aside as test data, for a total of 17,000 additional training pairs.

### 3. Beam-splitter System and Calibration

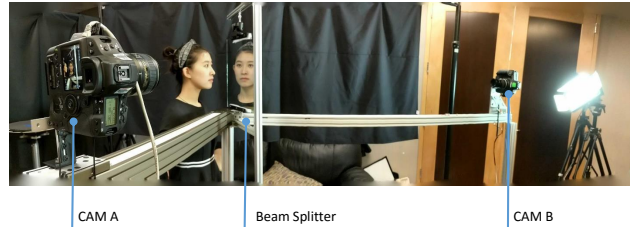

Figure 1. Beam-splitter capturing system.

Our beam-splitter capture system enables simultaneous photography of a subject at two different distances. As shown in Figure 1, our system includes one fixed camera CAM B at the canonical distance of  $1.6m$ , one sliding camera CAM A at variable distances from  $23cm$  to  $137cm$  and a

| Specs          | CAM A                 | CAM B                 |
|----------------|-----------------------|-----------------------|
| Model          | Canon EOS-1DX         | Canon EOS-1DX Mark II |
| Lens           | AF-s NIKKOR 17 – 35mm | Nikon 135mm           |
| F-stop         | F-2.8                 | F-2.8                 |
| Sync           | Hardware sync         | Hardware sync         |
| Data Streaming | FTP Server            | FTP Server            |

Table 1. Camera Specifications.

plate beam-splitter at  $45^\circ$  along a metal rail. Figure 2 shows the details of our system.

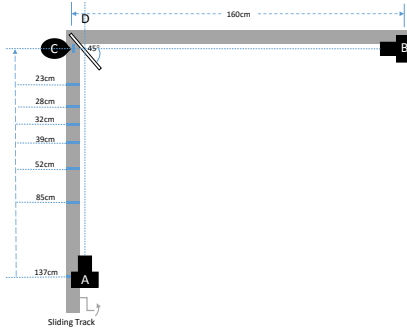

Figure 2. Illustration of Beam-splitter system.

**Hardware Specifications.** In Table 1, we list the specifications of the two cameras. The beam-splitter is a  $254mm \times 356mm$  Edmund Optics plate beam-splitter, with 50% reflection and 50% transmission of incident light.

**Calibration.** In order to capture near “ground truth” images pairs where only distances vary, we carefully calibrate the two cameras geometrically and radiometrically, thereby eliminating potential differences in pose and color rendition. We start with a leveled surface, aligning CAM A and CAM B horizontally. We then use a laser pointer to align the optical axes of the two cameras. In particular, we point the laser at C as shown in Figure 2, which shines a red dot at the lens center of CAM B. We then adjust the angle of the beam-splitter so that when looking through beam-splitter from D, the red dot passes through the lens center of CAM A. We photograph a color chart with each camera and compute a color correction matrix to match the color rendition of the image pairs, which may be different owing to different light transport phenomena of the different lenses of CAM A and CAM B. We also captured a checker board image for each camera immediately after each subject photograph, which we used for per-pixel alignment of the image pairs, achieved via a similarity transformation.

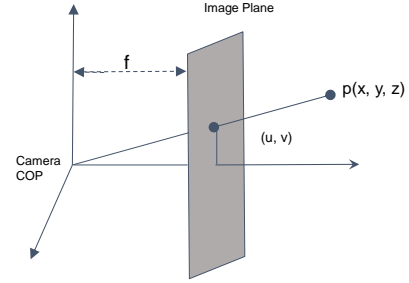

Figure 3. Illustration of camera perspective projection.

#### 4. Distance Estimation in *log*-space

In Figure 3,  $p(x, y, z)$  is one point of a 3D object, and  $(u, v)$  is the corresponding pixel location of  $p$  projected on the image plane. The equation of perspective projection of  $u$  is as below ( $v$  is similar):

$$u = x \cdot f / z \quad (1)$$

When only the camera-to-subject distance of the point  $p$  is varied, this is equivalent to a change only in  $z$ . The derivative of  $u$  with respect to  $z$  is as below:

$$\begin{aligned} \frac{d_u}{d_z} &= (-x \cdot f) \frac{1}{z^2} \\ &= C_1 \cdot \frac{1}{z^2} \end{aligned} \quad (2)$$

In which  $C_1 = (-x \cdot f)$  is a constant. The pixel location change caused by varying camera-to-subject distance is therefore non-linear. However, to use uniform sampling in our distance prediction network, a linear space is preferable. Thus we consider a *log*-space mapping instead. Equation 1 now becomes:

$$\begin{aligned} \log(u) &= \log(x \cdot f / z) \\ &= \log(x \cdot f) - \log(z) \\ &= C_2 - \log(z) \end{aligned} \quad (3)$$

In Equation 3,  $C_2$  is a constant and  $\log(u)$  is a linear mapping of  $\log(z)$ , which means that in *log*-space, the perspective projection is a linear mapping of camera-to-subject distances. Thus in our distance estimation network, we adopt *log*-space instead of directly using of the actual distances.

## 5. 35mm Equivalent Focal Length

The term “35mm equivalent focal length” of a digital or film camera with an accompanying lens is the focal length that would be required for a standard 35mm film camera to achieve the same field of view. This standard film camera was the most widely used type before the digital camera revolution. Now that a variety of imaging sensor sizes are commonly available in digital cameras, the focal length alone does not determine the field-of-view. Hence, this canonical reference helps photographers standardize their field-of-view understanding for different lenses and sensor combinations. In our case, our canonical camera (at a distance of 1.6m)’s 35mm equivalent to a focal length is 128.4mm.

## 6. Conversion between Focal Length and Distances

To ensure that all portraits have the same framing (or, stated differently, that the size of the subject’s head remains the same as measured by the inter-pupillary distance), when the camera-to-subject distance changes, then the focal length of the camera should change proportionally. In our case, the equation to convert a change in camera-to-subject distance to a change in 35mm equivalent focal length is as below:

$$f = D \times 128.4mm/160cm \quad (4)$$

In which  $D$  is the camera-to-subject distance, and  $f$  is the corresponding 35mm equivalent focal length.

## References

- [1] O. Alexander, G. Fyffe, J. Busch, X. Yu, R. Ichikari, A. Jones, P. Debevec, J. Jimenez, E. Danvoye, B. Antionazzi, et al. Digital ira: Creating a real-time photoreal digital actor. In *ACM SIGGRAPH 2013 Posters*, page 1. ACM, 2013. 1
- [2] M. Chiang and G. Fyffe. Realistic real-time rendering of eyes and teeth. 2010. 1
- [3] J. Long, E. Shelhamer, and T. Darrell. Fully convolutional networks for semantic segmentation. In *Proceedings of the IEEE conference on computer vision and pattern recognition*, pages 3431–3440, 2015. 1
- [4] X. Shen, A. Hertzmann, J. Jia, S. Paris, B. Price, E. Shechtman, and I. Sachs. Automatic portrait segmentation for image stylization. In *Computer Graphics Forum*, volume 35, pages 93–102. Wiley Online Library, 2016. 1
- [5] P. Viola and M. J. Jones. Robust real-time face detection. *International journal of computer vision*, 57(2):137–154, 2004. 1
- [6] X. Zhang, L. Yin, J. F. Cohn, S. Canavan, M. Reale, A. Horowitz, and P. Liu. A high-resolution spontaneous 3d dynamic facial expression database. In *2013 10th IEEE International Conference and Workshops on Automatic Face and Gesture Recognition (FG)*, pages 1–6. IEEE, 2013. 1
