# Supplementary material
Source: ML conference proceedings conference paper supplement (https://openaccess.thecvf.com/content/ICCV_2019/html/Zhao_Learning_Perspective_Undistortion_ICCV_2019_paper.html)
Supplement: Supplementary file 1 [file Zhao_Learning_Perspective_Undistortion_ICCV_2019_supplemental.pdf › 3593-supp/Learning Perspective Undistortion of Portraits_supplementary.pdf]

# Learning Perspective Undistortion of Portraits

## Supplementary Material

Yajie Zhao<sup>1,\*</sup>, Zeng Huang<sup>1,2,\*</sup>, Tianye Li<sup>1,2</sup>, Weikai Chen<sup>1</sup>, Chloe LeGendre<sup>1,2</sup>, Xinglei Ren<sup>1</sup>,  
Jun Xing<sup>1</sup>, Ari Shapiro<sup>1</sup>, and Hao Li<sup>1,2,3</sup>

<sup>1</sup>USC Institute for Creative Technologies

<sup>2</sup>University of Southern California

<sup>3</sup>Pinscreen

**Consistency of Undistortion Results.** In Figure 1, although the inputs are in different distortion magnitudes, our results show consistency regarding the face proportion and shapes of eyebrow, mouth and eyes.

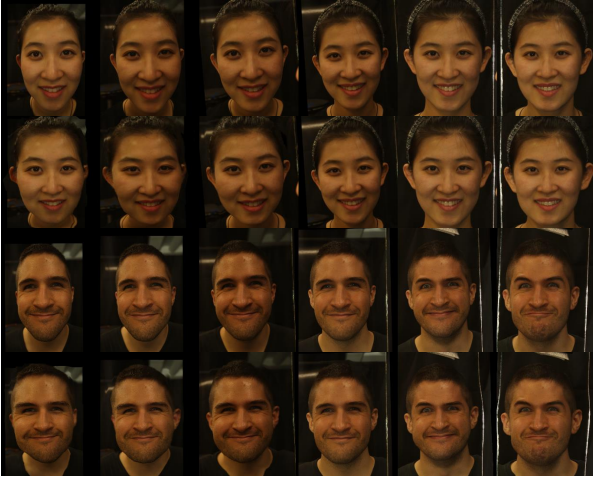

Figure 1. Portrait undistortion in different distances. *First and Third rows* are the input portraits with distortion. *Second and Forth rows* are the results of our approach. *From the left to the right column*: portraits taken at 23cm, 28cm, 32cm, 52cm, 85cm and 118cm camera-to-subject distance.

**More Results of in the wild Portraits.** We show more results of in-the-wild portraits in Figure 2.

**Evaluation on CMDP dataset.** We test our model with 102 photos (2 photos per individual with nearest distances 609.6mm and 914.4mm) from the CMDP dataset. We achieve 95.12% accuracy on the distance label prediction task. Figure 3 shows example results. As there is no ground truth for quantitative evaluation for this dataset, we aligned photos taken at 1820mm to show as references.

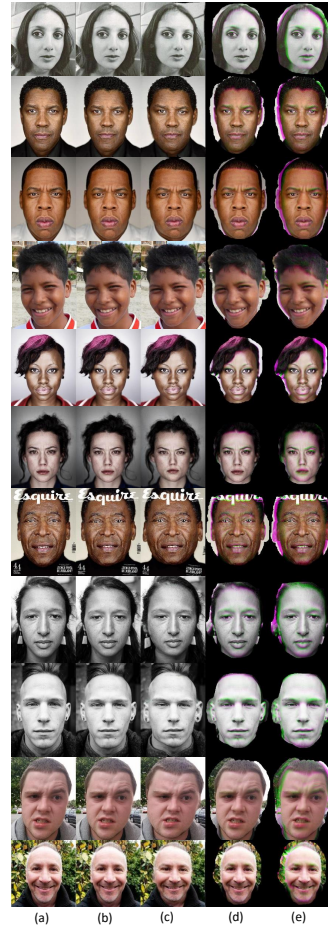

Figure 2. Evaluation and comparisons with Fried et al. [1] on various in-the-wild datasets. (a) inputs; (b) Fried et al. [1]; (c) Ours; (d) Mixture of (a) and (b) for better visualization of undistortion; (e) Mixture of (a) and (c).

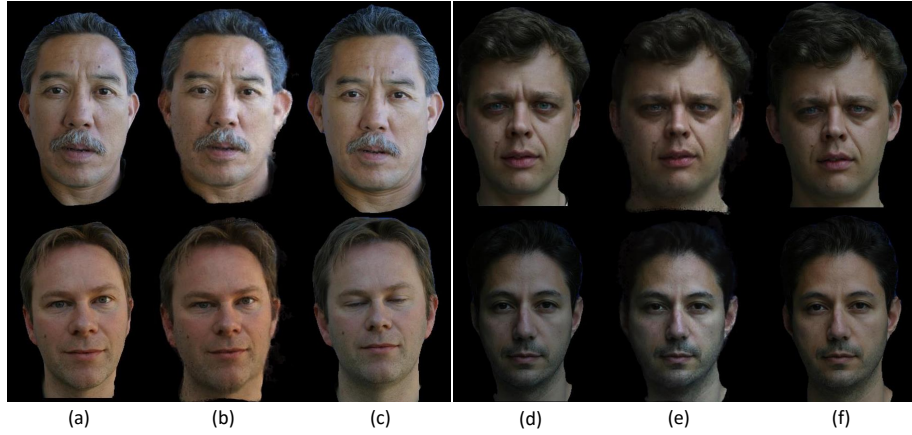

Figure 3. Evaluations on CMDP. (a) and (d) are inputs; (b) and (e) are output from *CompletionNet*; (c) and (f) are references captured around  $1.82m$ .

## References

- [1] O. Fried, E. Shechtman, D. B. Goldman, and A. Finkelstein.  
 Perspective-aware manipulation of portrait photos. *ACM  
 Transactions on Graphics (TOG)*, 35(4):128, 2016. [1](#)
